# Supplementary material
Source: PubMed Central journal article supplement (PMC3930067)

## Supplemental Figure Legends

**Supplemental Figure 1.** Visualization of Fluorescent Microspheres. A BxPC-3 xenograft tumor with a single central intratumoral injection of fluorescent microspheres (0.5  $\mu\text{m}$ ) was fixed and stained with 4',6-diamidino-2-phenylindole. A, Significant extratumoral deposition of the fluorescent microspheres can be seen on this collage view of the entire tumor section. B and C, Higher-power views of the micrographs marked 1 and 2 in A, respectively, showing the breach of the tumor capsule. D, Higher-power view of micrograph 3 showing a generally sparse but rather uniform distribution of fluorescent microspheres in the central tumor region.

**Supplemental Figure 2.** Visualization of Fluorescent Microspheres. BxPC-3 xenograft injected intratumorally with 0.5  $\mu\text{m}$  red fluorescent microspheres. A and B, Phase-contrast and fluorescent micrographs, respectively. C, Overlay of phase-contrast and fluorescence micrographs in a central region of the tumor near the injection site. Note the areas of microsphere accumulation along the fibroblast/tumor cell boundaries.

**Supplemental Figure 3.** Micro-computed tomography image of a dilution series of Omnipaque 300 in phosphate-buffered saline (PBS).

**Supplemental Figure 4.** Effect of 10% Omnipaque 300 on infection of cultured cells with measles virus containing and an additional gene encoding human green fluorescent protein (MV-GFP). MV-GFP was diluted to 100 Vero TCID<sub>50</sub>/mL in either Opti-MEM (control) or 10% (v/v) Omnipaque 300. The mixture was incubated on ice for 10 minutes and added to monolayers of BxPC-3, FaDu, or SCC-25 cells. At 48 hours, the number of MV-GFP-positive syncytia per well were counted.

# Supplemental Figure 1

1  
2  
3  
4  
5  
6  
7  
8  
9  
10  
11  
12  
13  
14  
15  
16  
17  
18  
19  
20  
21  
22  
23  
24  
25  
26  
27  
28  
29  
30  
31  
32  
33  
34  
35  
36  
37  
38  
39  
40  
41  
42  
43  
44  
45  
46  
47  
48  
49

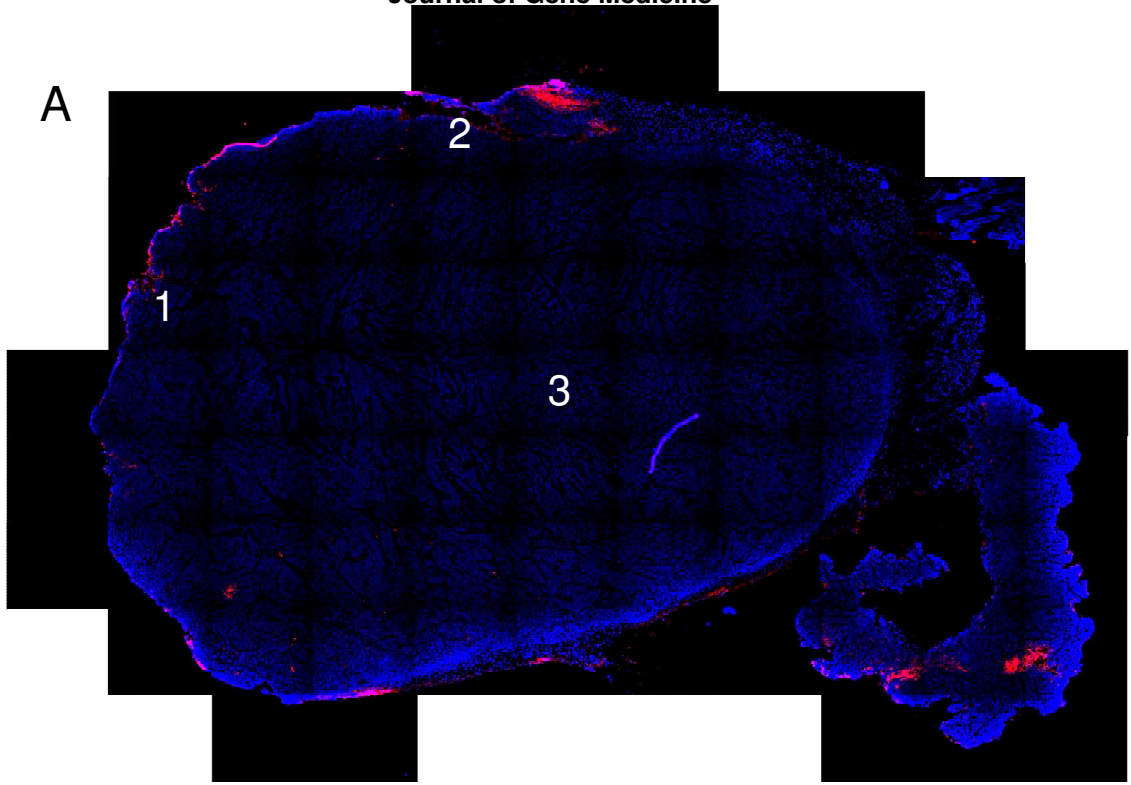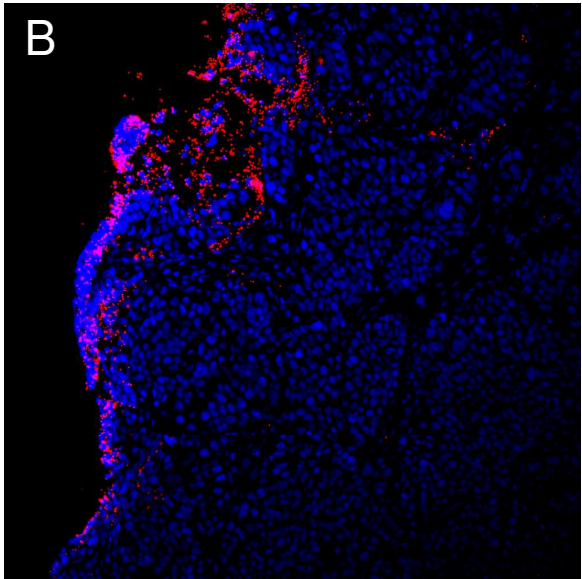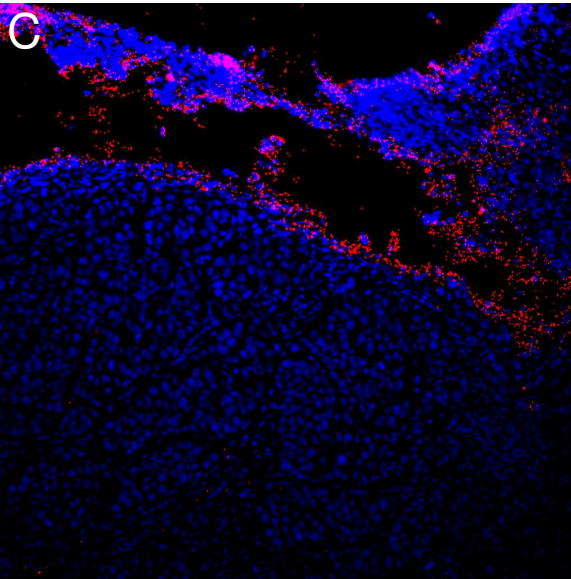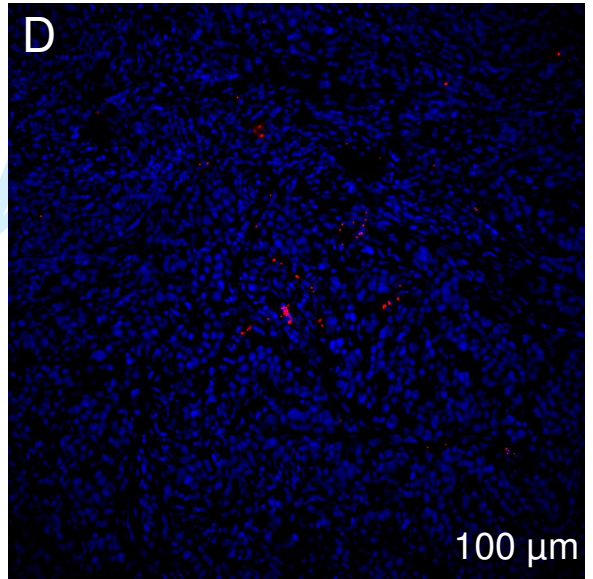



# Supplemental Figure 2

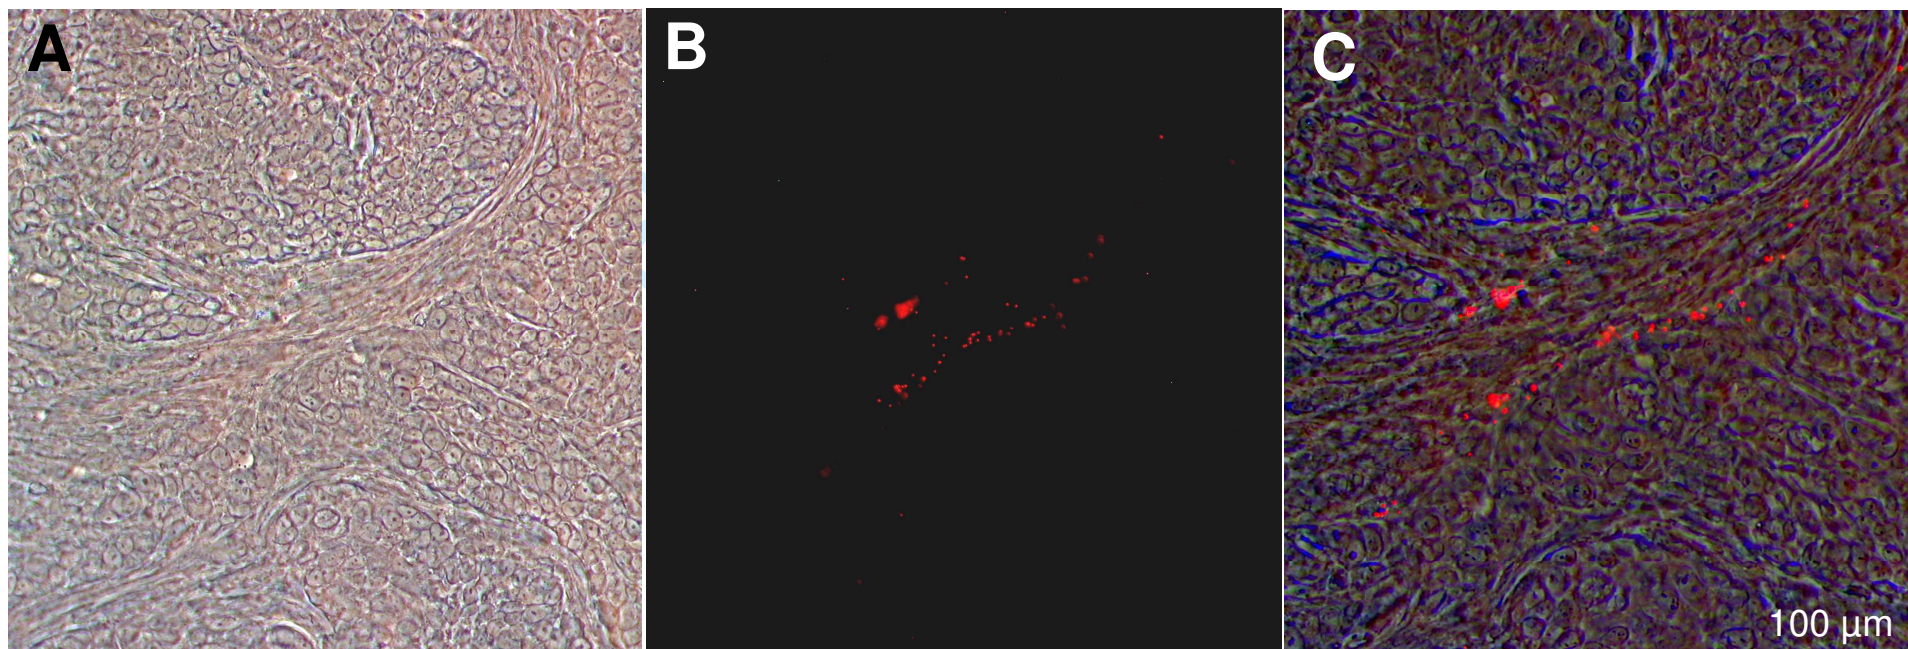

# Supplemental Figure 3

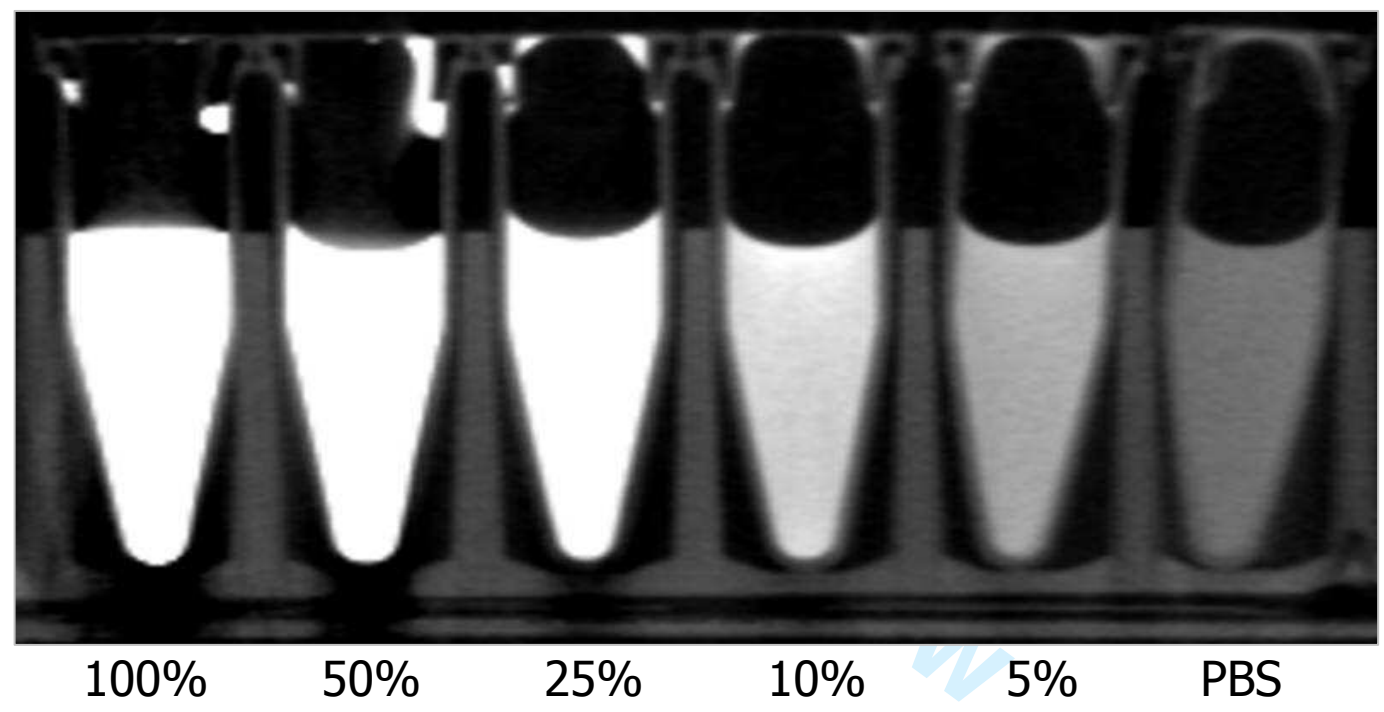

1  
2  
3  
4  
5  
6  
7  
8  
9  
10  
11  
12  
13  
14  
15  
16  
17  
18  
19  
20  
21  
22  
23  
24  
25  
26  
27  
28  
29  
30  
31  
32  
33  
34  
35  
36  
37  
38  
39  
40  
41  
42  
43  
44  
45  
46  
47  
48  
49

Supplemental  
Figure 4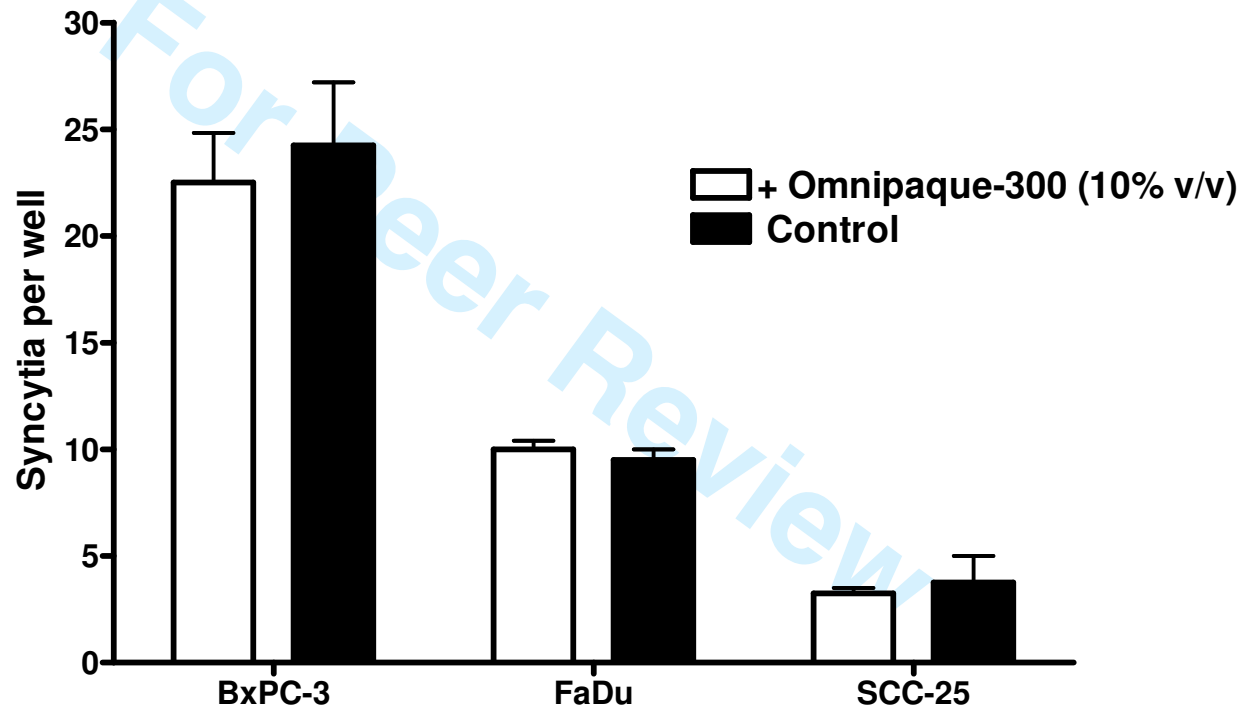

Supplement: NIHMS546387-supplement-Supplement.pdf [file NIHMS546387-supplement-Supplement.pdf]
